# Supplementary material for: What Makes Small-Scale Fishers Resilient? Lessons from the Coping Strategies under COVID-19 Outbreak Observed in Trang Province, Thailand
Source: Preprints.org preprint supplement (doi:10.20944/preprints202201.0273.v1), 2022-01-19
Supplement: Supplementary file 1 [file supplementary]

**Appendix: Interview Guiding Questions**

The following are the guiding questions for the interview survey. Please ask the respondents’ perceptions on the impacts and coping strategies under the COVID-19 outbreak, at four different stages: 1) before the COVID-19 outbreak (March 2020), 2) during the lockdown (April-July 2020), 3) after the lockdown (October 2020), 4) after a year from the lockdown (April 2021). The interviews should normally take approximately 1-2 hours in length, per respondent. Since this is a semi-structured interview, the interviewers are expected to flexibly ask questions depending on the reactions or interests of the respondents. The interviewer does not have to ask the following questions in the order presented; wordings are also flexible. Please ensure to understand the objectives and the intention of this survey well, and attempt to obtain as much information as possible, particularly on the reasons or the socio-economic backgrounds that exist behind their responses. As for 1. Natural Capital and 3. Financial Capital, please also obtain quantitative data (i.e. daily fish catch, monthly income) at four different stages. In case the respondent is not comfortable in answering any of the questions, please do not hesitate to skip the question.

**1. Natural Capital**

1. What types of local natural resources (e.g. fish, crab, shrimp, fuelwood etc.) did you use before the COVID-19 outbreak (i.e. before March 2020)? How much was your daily fish catch (kg) for income generation?
2. How did the COVID-19 lockdown (i.e. April-July 2020) affect your natural resource utilisation? How much was your daily fish catch (kg) for income generation? What were the major reasons that caused such situations? What have you done to cope with the situation?
3. After the lockdown was over (in October 2020), were there any changes in your natural resource utilisation from the lockdown period? How much was your daily fish catch (kg) for income generation? What were the major reasons that caused such situations? What have you done to cope with the situation?
4. Recently (i.e. April 2021), how do you utilise natural resources? How much is your daily fish catch (kg) for income generation? What were the major reasons that caused such situations? What have you done to cope with the situation?

**2. Social Capital**

1. How were your social relationships with your family, neighbours, colleagues, and community members before the COVID-19 outbreak (i.e. before March 2020)?
2. How did the COVID-19 lockdown (i.e. April-July 2020) affect your social relationships? What were the major reasons that caused such situations? What have you done to cope with the situation?
3. After the lockdown was over (i.e. October 2020), were there any changes in your social relationships from the lockdown period? What were the major reasons that caused such situations? What have you done to cope with the situation?
4. Recently (i.e. April 2021), how are your social relationships? What were the major reasons that caused such situations? What have you done to cope with the situation?

**3. Financial Capital**

1. What was your income source(s)/occupation before the COVID-19 outbreak (i.e. before March 2020)? Please tell us if you have more than one income source. How much was your monthly income (THB)?
2. How did the COVID-19 lockdown (i.e. April-July 2020) affect your income/occupation? How much was your monthly income (THB)? What were the major reasons that caused such situations? What have you done to cope with the situation?
3. After the lockdown was over (i.e. October 2020), how did your income/occupation change from the lockdown period? How much was your monthly income (THB)? What were the major reasons that caused such situations? What have you done to cope with the situation?
4. Recently (i.e. April 2021), how is your income/occupation? How much is your monthly income (THB)? What were the major reasons that caused such situations? What have you done to cope with the situation?

**4. Human Capital**

1. What types of skills/knowledge did you have before the COVID-19 outbreak (i.e. before March 2020)? How was your health condition during this period?
2. Did the COVID-19 lockdown (i.e. April-July 2020) affect your skills/knowledge? How was your health condition during this period? What were the major reasons that caused such situations? What have you done to cope with the situation?
3. Were there any changes in your skills/knowledge after the lockdown was over (i.e. October 2020)? How was your health condition at this period? What were the major reasons that caused such situations? What have you done to cope with the situation?
4. Recently (i.e. April 2021), were there any changes in your skills/knowledge? How is your health condition? What are the major reasons that caused such situations? What have you done to cope with the situation?

**5. Physical Capital**

1. What types of possessions (e.g. fishing boats, fishing gears, motorbikes, vehicles)/infrastructures did you use for your work before the COVID-19 outbreak (i.e. before March 2020)?
2. Did the COVID-19 lockdown (i.e. April-July 2020) affect your possessions/infrastructures? What were the major reasons that caused such situations? What have you done to cope with the situation?
3. Were there any changes in your possessions/infrastructures after the lockdown was over (i.e. October 2020)? What were the major reasons that caused such situations? What have you done to cope with the situation?
4. Recently (i.e. April 2021), were there any changes in your possessions/infrastructures? What are the major reasons that caused such situations? What have you done to cope with the situation?
